# Supplementary material for: EbfC/YbaB: A Widely Distributed Nucleoid-Associated Protein in Prokaryotes
Source: Microorganisms. 2022 Sep 30;10(10):1945. doi: 10.3390/microorganisms10101945 (PMC9610160; doi:10.3390/microorganisms10101945)
Supplement: Supplementary file 1 [file microorganisms-10-01945-s001.zip › Table S1.xlsx]

## Sheet: Table S1
Homologous group	Accession	Tax Name	Length	Matches
-1	P9WJB8	Mycobacterium tuberculosis (strain CDC 1551 / Oshkosh)	115	17..101
-1	Q83DN9	Coxiella burnetii (strain RSA 493 / Nine Mile phase I)	143	22..105
1	A0R898	Bacillus thuringiensis (strain Al Hakam)	109	2..109
1	A2RCN9	Streptococcus pyogenes serotype M5 (strain Manfredo)	99	1..99
1	A2RHJ9	Lactococcus lactis subsp. cremoris (strain MG1363)	99	1..99
1	A3CKS8	Streptococcus sanguinis (strain SK36)	99	1..99
1	A4IJA0	Geobacillus thermodenitrificans (strain NG80-2)	108	2..108
1	A4VSS3	Streptococcus suis (strain 05ZYH33)	99	1..99
1	A5IQ31	Staphylococcus aureus (strain JH9)	105	3..105
1	A8YTF6	Lactobacillus helveticus (strain DPC 4571)	111	5..111
1	B1HS62	Lysinibacillus sphaericus (strain C3-41)	104	3..104
1	B1IBP0	Streptococcus pneumoniae (strain Hungary19A-6)	99	1..99
1	B1YGC9	Exiguobacterium sibiricum (strain DSM 17290 / CIP 109462 / JCM 13490 / 255-15)	106	3..106
1	B3W9Z1	Lacticaseibacillus casei (strain BL23)	99	1..99
1	B9DLF6	Staphylococcus carnosus (strain TM300)	105	3..105
1	B9DVQ2	Streptococcus uberis (strain ATCC BAA-854 / 0140J)	99	1..99
1	B9E8X3	Macrococcus caseolyticus (strain JCSC5402)	106	3..106
1	C0MEQ5	Streptococcus equi subsp. zooepidemicus (strain H70)	99	1..99
1	C4KZX3	Exiguobacterium sp. (strain ATCC BAA-1283 / AT1b)	105	3..105
1	P24281	Bacillus subtilis (strain 168)	107	1..107
1	P67264	Streptococcus agalactiae serotype III (strain NEM316)	99	1..99
1	Q03E58	Pediococcus pentosaceus (strain ATCC 25745 / CCUG 21536 / LMG 10740 / 183-1w)	104	1..104
1	Q03JB0	Streptococcus thermophilus (strain ATCC BAA-491 / LMD-9)	99	1..99
1	Q045U8	Lactobacillus gasseri (strain ATCC 33323 / DSM 20243 / BCRC 14619 / CIP 102991 / JCM 1131 / KCTC 3163 / NCIMB 11718 / NCTC 13722 / AM63)	109	5..109
1	Q048W5	Lactobacillus delbrueckii subsp. bulgaricus (strain ATCC BAA-365 / Lb-18)	109	4..109
1	Q1WSU4	Ligilactobacillus salivarius (strain UCC118)	104	4..104
1	Q5WLZ4	Alkalihalobacillus clausii (strain KSM-K16)	105	2..105
1	Q830K2	Enterococcus faecalis (strain ATCC 700802 / V583)	104	1..104
1	Q88YP9	Lactiplantibacillus plantarum (strain ATCC BAA-793 / NCIMB 8826 / WCFS1)	102	1..102
1	Q8DVS3	Streptococcus mutans serotype c (strain ATCC 700610 / UA159)	99	1..99
1	Q8EU59	Oceanobacillus iheyensis (strain DSM 14371 / CIP 107618 / JCM 11309 / KCTC 3954 / HTE831)	104	1..104
2	A0K7V0	Burkholderia cenocepacia (strain HI2424)	108	3..108
2	A0KKD5	Aeromonas hydrophila subsp. hydrophila (strain ATCC 7966 / DSM 30187 / BCRC 13018 / CCUG 14551 / JCM 1027 / KCTC 2358 / NCIMB 9240 / NCTC 8049)	109	1..109
2	A0Q767	Francisella tularensis subsp. novicida (strain U112)	112	1..111
2	A1JNB8	Yersinia enterocolitica serotype O:8 / biotype 1B (strain NCTC 13174 / 8081)	110	1..110
2	A1SX02	Psychromonas ingrahamii (strain 37)	109	1..109
2	A1U127	Marinobacter nauticus (strain ATCC 700491 / DSM 11845 / VT8)	107	1..107
2	A1WTL3	Halorhodospira halophila (strain DSM 244 / SL1)	107	1..107
2	A2SIU9	Methylibium petroleiphilum (strain ATCC BAA-1232 / LMG 22953 / PM1)	108	3..108
2	A3MYE7	Actinobacillus pleuropneumoniae serotype 5b (strain L20)	109	1..109
2	A4G3Y9	Herminiimonas arsenicoxydans	108	2..108
2	A4SWQ5	Polynucleobacter asymbioticus (strain DSM 18221 / CIP 109841 / QLW-P1DMWA-1)	107	2..107
2	A5IHS9	Legionella pneumophila (strain Corby)	112	4..109
2	A5W0U6	Pseudomonas putida (strain ATCC 700007 / DSM 6899 / BCRC 17059 / F1)	111	2..111
2	A6VYC3	Marinomonas sp. (strain MWYL1)	108	3..108
2	A9HZ13	Bordetella petrii (strain ATCC BAA-461 / DSM 12804 / CCUG 43448)	108	2..108
2	A9KC74	Coxiella burnetii (strain Dugway 5J108-111)	110	3..104
2	B0TY94	Francisella philomiragia subsp. philomiragia (strain ATCC 25017 / FSC 153 / O#319-036)	111	1..110
2	B0U2T5	Xylella fastidiosa (strain M12)	107	2..107
2	B2FR75	Stenotrophomonas maltophilia (strain K279a)	106	1..106
2	B2U9S6	Ralstonia pickettii (strain 12J)	115	2..115
2	B2VCL7	Erwinia tasmaniensis (strain DSM 17950 / CFBP 7177 / CIP 109463 / NCPPB 4357 / Et1/99)	109	1..109
2	B4RU48	Alteromonas mediterranea (strain DSM 17117 / CIP 110805 / LMG 28347 / Deep ecotype)	109	3..108
2	B5EJE0	Acidithiobacillus ferrooxidans (strain ATCC 53993 / BNL-5-31)	107	1..107
2	B5FFM5	Aliivibrio fischeri (strain MJ11)	111	2..111
2	B7UVI9	Pseudomonas aeruginosa (strain LESB58)	108	2..108
2	B7VL97	Vibrio atlanticus (strain LGP32)	109	1..109
2	B8D811	Buchnera aphidicola subsp. Acyrthosiphon pisum (strain Tuc7)	109	1..108
2	C3K0S7	Pseudomonas fluorescens (strain SBW25)	112	2..112
2	C4L8U5	Tolumonas auensis (strain DSM 9187 / TA4)	110	1..110
2	C5BCZ9	Edwardsiella ictaluri (strain 93-146)	109	1..109
2	P57825	Pasteurella multocida (strain Pm70)	109	1..109
2	Q057E0	Buchnera aphidicola subsp. Cinara cedri (strain Cc)	102	2..97
2	Q080R4	Shewanella frigidimarina (strain NCIMB 400)	110	2..110
2	Q0A8H9	Alkalilimnicola ehrlichii (strain ATCC BAA-1101 / DSM 17681 / MLHE-1)	107	1..107
2	Q0AIG3	Nitrosomonas eutropha (strain DSM 101675 / C91 / Nm57)	107	1..107
2	Q0VNM6	Alcanivorax borkumensis (strain ATCC 700651 / DSM 11573 / NCIMB 13689 / SK2)	105	1..105
2	Q1LTX7	Baumannia cicadellinicola subsp. Homalodisca coagulata	112	1..108
2	Q1QXJ6	Chromohalobacter salexigens (strain ATCC BAA-138 / DSM 3043 / CIP 106854 / NCIMB 13768 / 1H11)	108	2..108
2	Q2KVU6	Bordetella avium (strain 197N)	108	2..108
2	Q2P6V7	Xanthomonas oryzae pv. oryzae (strain MAFF 311018)	106	1..106
2	Q2SIX0	Hahella chejuensis (strain KCTC 2396)	108	3..108
2	Q3IKN3	Pseudoalteromonas translucida (strain TAC 125)	108	3..108
2	Q3J7Z9	Nitrosococcus oceani (strain ATCC 19707 / BCRC 17464 / JCM 30415 / NCIMB 11848 / C-107)	106	1..106
2	Q3KFA7	Pseudomonas fluorescens (strain Pf0-1)	112	2..112
2	Q47HW8	Dechloromonas aromatica (strain RCB)	107	2..107
2	Q47XR0	Colwellia psychrerythraea (strain 34H / ATCC BAA-681)	108	2..108
2	Q48KQ5	Pseudomonas savastanoi pv. phaseolicola (strain 1448A / Race 6)	108	2..108
2	Q5P7F0	Aromatoleum aromaticum (strain EbN1)	107	2..107
2	Q5QWR0	Idiomarina loihiensis (strain ATCC BAA-735 / DSM 15497 / L2-TR)	108	3..108
2	Q609A8	Methylococcus capsulatus (strain ATCC 33009 / NCIMB 11132 / Bath)	107	1..107
2	Q7NXL5	Chromobacterium violaceum (strain ATCC 12472 / DSM 30191 / JCM 1249 / NBRC 12614 / NCIMB 9131 / NCTC 9757)	112	1..112
2	Q7VY13	Bordetella pertussis (strain Tohama I / ATCC BAA-589 / NCTC 13251)	108	2..108
2	Q89A94	Buchnera aphidicola subsp. Baizongia pistaciae (strain Bp)	110	1..110
2	Q8D229	Wigglesworthia glossinidia brevipalpis	102	1..102
2	Q8EFF9	Shewanella oneidensis (strain MR-1)	109	1..109
3	B0JH61	Microcystis aeruginosa (strain NIES-843)	114	9..114
3	B2J719	Nostoc punctiforme (strain ATCC 29133 / PCC 73102)	115	8..115
3	B7K422	Rippkaea orientalis (strain PCC 8801)	114	9..114
3	B7KHF1	Gloeothece citriformis (strain PCC 7424)	114	6..114
3	B8HWY2	Cyanothece sp. (strain PCC 7425 / ATCC 29141)	114	9..114
3	O82230	Arabidopsis thaliana	182	1..182
3	P73057	Synechocystis sp. (strain PCC 6803 / Kazusa)	114	6..114
3	Q5N376	Synechococcus sp. (strain ATCC 27144 / PCC 6301 / SAUG 1402/1)	113	7..113
3	Q8DKX6	Thermosynechococcus vestitus (strain IAM M-273 / NIES-2133 / BP-1)	115	9..115
3	Q9M098	Arabidopsis thaliana	180	1..180
4	B0B7Q3	Chlamydia trachomatis serovar L2 (strain 434/Bu / ATCC VR-902B)	96	1..96
4	Q253U4	Chlamydia felis (strain Fe/C-56)	96	1..96
4	Q5L6F1	Chlamydia abortus (strain DSM 27085 / S26/3)	96	1..96
4	Q6MDZ8	Protochlamydia amoebophila (strain UWE25)	98	1..93
4	Q9Z9E2	Chlamydia pneumoniae	96	1..96
5	A1QZP7	Borrelia turicatae (strain 91E135)	99	1..99
5	B7J228	Borreliella burgdorferi (strain ZS7)	99	1..99
5	Q04NY0	Leptospira borgpetersenii serovar Hardjo-bovis (strain JB197)	115	2..114
6	A2BNE6	Prochlorococcus marinus (strain AS9601)	116	6..114
6	A2BTV8	Prochlorococcus marinus (strain MIT 9515)	116	6..115
6	A2BZC3	Prochlorococcus marinus (strain NATL1A)	115	6..114
6	A2C5M1	Prochlorococcus marinus (strain MIT 9303)	113	6..113
6	A5GHN7	Synechococcus sp. (strain WH7803)	113	6..113
6	A5GPW9	Synechococcus sp. (strain RCC307)	111	6..111
6	A9B9L9	Prochlorococcus marinus (strain MIT 9211)	115	6..113
6	Q2JH54	Synechococcus sp. (strain JA-2-3B'a(2-13))	111	5..110
6	Q3ANM6	Synechococcus sp. (strain CC9605)	113	6..113
6	Q7NFM6	Gloeobacter violaceus (strain ATCC 29082 / PCC 7421)	111	5..111
6	Q7VEJ3	Prochlorococcus marinus (strain SARG / CCMP1375 / SS120)	115	6..114
7	A0AM40	Listeria welshimeri serovar 6b (strain ATCC 35897 / DSM 20650 / CIP 8149 / NCTC 11857 / SLCC 5334 / V8)	105	3..105
7	A0RM43	Campylobacter fetus subsp. fetus (strain 82-40)	103	3..103
7	A6Q1L1	Nitratiruptor sp. (strain SB155-2)	103	1..103
7	A6QCK9	Sulfurovum sp. (strain NBC37-1)	103	3..103
7	A7H0Y1	Campylobacter curvus (strain 525.92)	105	3..105
7	A7HZW7	Campylobacter hominis (strain ATCC BAA-381 / LMG 19568 / NCTC 13146 / CH001A)	108	3..105
7	A7ZFX5	Campylobacter concisus (strain 13826)	104	3..104
7	A8ERY0	Aliarcobacter butzleri (strain RM4018)	106	7..106
7	B2UW37	Helicobacter pylori (strain Shi470)	100	1..99
7	B9KEJ4	Campylobacter lari (strain RM2100 / D67 / ATCC BAA-1060)	101	3..101
7	O34247	Wolinella succinogenes (strain ATCC 29543 / DSM 1740 / LMG 7466 / NCTC 11488 / FDC 602W)	102	1..102
7	Q7VJB1	Helicobacter hepaticus (strain ATCC 51449 / 3B1)	108	1..107
7	Q9PM34	Campylobacter jejuni subsp. jejuni serotype O:2 (strain ATCC 700819 / NCTC 11168)	99	1..99
8	A1KUP8	Neisseria meningitidis serogroup C / serotype 2a (strain ATCC 700532 / DSM 15464 / FAM18)	111	1..109
8	A1UU35	Bartonella bacilliformis (strain ATCC 35685 / NCTC 12138 / KC583)	108	1..107
8	A3M5B7	Acinetobacter baumannii (strain ATCC 17978 / CIP 53.77 / LMG 1025 / NCDC KC755 / 5377)	109	1..109
8	A4YLB3	Bradyrhizobium sp. (strain ORS 278)	106	1..106
8	A5G017	Acidiphilium cryptum (strain JF-5)	107	1..107
8	A5VMY3	Brucella ovis (strain ATCC 25840 / 63/290 / NCTC 10512)	107	1..107
8	A5WG78	Psychrobacter sp. (strain PRwf-1)	110	1..109
8	A8F088	Rickettsia canadensis (strain McKiel)	107	1..107
8	A8GU26	Rickettsia rickettsii (strain Sheila Smith)	107	1..107
8	A8GU86	Rickettsia bellii (strain OSU 85-389)	107	1..107
8	A9H481	Gluconacetobacter diazotrophicus (strain ATCC 49037 / DSM 5601 / CCUG 37298 / CIP 103539 / LMG 7603 / PAl5)	107	1..107
8	A9IMY0	Bartonella tribocorum (strain CIP 105476 / IBS 506)	107	1..107
8	B0T1T3	Caulobacter sp. (strain K31)	109	1..109
8	B2ICM2	Beijerinckia indica subsp. indica (strain ATCC 9039 / DSM 1715 / NCIMB 8712)	101	1..101
8	B3QCG6	Rhodopseudomonas palustris (strain TIE-1)	106	1..105
8	B4RDT4	Phenylobacterium zucineum (strain HLK1)	107	1..107
8	B6IPJ0	Rhodospirillum centenum (strain ATCC 51521 / SW)	107	1..107
8	B6JJQ2	Afipia carboxidovorans (strain ATCC 49405 / DSM 1227 / KCTC 32145 / OM5)	105	1..104
8	B8EP16	Methylocella silvestris (strain DSM 15510 / CIP 108128 / LMG 27833 / NCIMB 13906 / BL2)	107	1..107
8	B8GYD9	Caulobacter vibrioides (strain NA1000 / CB15N)	109	1..109
8	Q07H53	Rhodopseudomonas palustris (strain BisA53)	105	1..105
8	Q0ASK8	Maricaulis maris (strain MCS10)	107	1..107
8	Q0BVJ4	Granulibacter bethesdensis (strain ATCC BAA-1260 / CGDNIH1)	107	1..107
8	Q0C592	Hyphomonas neptunium (strain ATCC 15444)	107	1..107
8	Q1QCM1	Psychrobacter cryohalolentis (strain ATCC BAA-1226 / DSM 17306 / VKM B-2378 / K5)	109	1..109
8	Q1QQZ4	Nitrobacter hamburgensis (strain DSM 10229 / NCIMB 13809 / X14)	106	1..105
8	Q20WW7	Rhodopseudomonas palustris (strain BisB18)	105	1..105
8	Q2RNM9	Rhodospirillum rubrum (strain ATCC 11170 / ATH 1.1.1 / DSM 467 / LMG 4362 / NCIMB 8255 / S1)	107	1..107
8	Q2VZR7	Magnetospirillum magneticum (strain AMB-1 / ATCC 700264)	107	1..107
8	Q3SVQ6	Nitrobacter winogradskyi (strain ATCC 25391 / DSM 10237 / CIP 104748 / NCIMB 11846 / Nb-255)	106	1..106
8	Q5FTB5	Gluconobacter oxydans (strain 621H)	107	1..107
8	Q68VP6	Rickettsia typhi (strain ATCC VR-144 / Wilmington)	107	1..107
8	Q6G0M7	Bartonella quintana (strain Toulouse)	108	1..107
8	Q6G4V1	Bartonella henselae (strain ATCC 49882 / DSM 28221 / Houston 1)	108	1..107
8	Q89BN3	Bradyrhizobium diazoefficiens (strain JCM 10833 / BCRC 13528 / IAM 13628 / NBRC 14792 / USDA 110)	106	1..106
8	Q8UJ43	Agrobacterium fabrum (strain C58 / ATCC 33970)	107	1..107
8	Q92SX1	Rhizobium meliloti (strain 1021)	107	1..107
8	Q98BM7	Mesorhizobium japonicum (strain LMG 29417 / CECT 9101 / MAFF 303099)	107	1..107
9	B1AI74	Ureaplasma parvum serovar 3 (strain ATCC 27815 / 27 / NCTC 11736)	99	1..99
9	B3PM35	Mycoplasma arthritidis (strain 158L3-1)	95	1..93
9	P47380	Mycoplasma genitalium (strain ATCC 33530 / G-37 / NCTC 10195)	100	1..100
9	P75502	Mycoplasma pneumoniae (strain ATCC 29342 / M129)	100	1..100
9	Q6KIL6	Mycoplasma mobile (strain ATCC 43663 / 163K / NCTC 11711)	95	1..94
9	Q7NAN6	Mycoplasma gallisepticum (strain R(low / passage 15 / clone 2))	100	1..100
9	Q8EUW1	Mycoplasma penetrans (strain HF-2)	94	1..94
9	Q98RF9	Mycoplasmopsis pulmonis (strain UAB CTIP)	100	2..100
10	A0M2C1	Gramella forsetii (strain KT0803)	108	1..106
10	A5FGU0	Flavobacterium johnsoniae (strain ATCC 17061 / DSM 2064 / JCM 8514 / NBRC 14942 / NCIMB 11054 / UW101)	106	1..105
10	A5IJA0	Thermotoga petrophila (strain ATCC BAA-488 / DSM 13995 / JCM 10881 / RKU-1)	118	8..118
10	A8F5Y1	Pseudothermotoga lettingae (strain ATCC BAA-301 / DSM 14385 / NBRC 107922 / TMO)	114	16..110
10	B2V5M9	Sulfurihydrogenibium sp. (strain YO3AOP1)	110	1..110
10	B7ICU2	Thermosipho africanus (strain TCF52B)	113	13..113
10	B9KAU2	Thermotoga neapolitana (strain ATCC 49049 / DSM 4359 / NBRC 107923 / NS-E)	118	12..118
10	C0QUF7	Persephonella marina (strain DSM 14350 / EX-H1)	110	1..110
11	A1KQ48	Mycobacterium bovis (strain BCG / Pasteur 1173P2)	133	3..123
11	A1SDH7	Nocardioides sp. (strain ATCC BAA-499 / JS614)	124	12..122
11	A1TGJ4	Mycolicibacterium vanbaalenii (strain DSM 7251 / JCM 13017 / BCRC 16820 / KCTC 9966 / NRRL B-24157 / PYR-1)	110	5..110
11	A1UMX4	Mycobacterium sp. (strain KMS)	110	5..110
11	A4F6D0	Saccharopolyspora erythraea (strain ATCC 11635 / DSM 40517 / JCM 4748 / NBRC 13426 / NCIMB 8594 / NRRL 2338)	116	5..116
11	A4QAN2	Corynebacterium glutamicum (strain R)	103	2..103
11	B1MFL8	Mycobacteroides abscessus (strain ATCC 19977 / DSM 44196 / CIP 104536 / JCM 13569 / NCTC 13031 / TMC 1543)	114	5..114
11	B1VIS5	Corynebacterium urealyticum (strain ATCC 43042 / DSM 7109)	105	2..105
11	B8ZT20	Mycobacterium leprae (strain Br4923)	116	3..113
11	C1B9N1	Rhodococcus opacus (strain B4)	113	5..113
11	C4LG87	Corynebacterium kroppenstedtii (strain DSM 44385 / JCM 11950 / CIP 105744 / CCUG 35717)	100	3..100
11	Q47TY1	Thermobifida fusca (strain YX)	116	5..116
11	Q4JSL4	Corynebacterium jeikeium (strain K411)	104	2..104
11	Q5Z355	Nocardia farcinica (strain IFM 10152)	110	5..110
11	Q6ABA0	Cutibacterium acnes (strain DSM 16379 / KPA171202)	107	9..106
11	Q6NJY1	Corynebacterium diphtheriae (strain ATCC 700971 / NCTC 13129 / Biotype gravis)	106	2..106
11	Q744M4	Mycolicibacterium paratuberculosis (strain ATCC BAA-968 / K-10)	116	4..112
11	Q8FU11	Corynebacterium efficiens (strain DSM 44549 / YS-314 / AJ 12310 / JCM 11189 / NBRC 100395)	107	2..106
11	Q9XAI3	Streptomyces coelicolor (strain ATCC BAA-471 / A3(2) / M145)	115	6..115
12	A0LM16	Syntrophobacter fumaroxidans (strain DSM 10017 / MPOB)	110	4..108
12	A5UTH4	Roseiflexus sp. (strain RS-1)	100	1..100
12	A9WEA9	Chloroflexus aurantiacus (strain ATCC 29366 / DSM 635 / J-10-fl)	100	1..100
12	B5YCC8	Dictyoglomus thermophilum (strain ATCC 35947 / DSM 3960 / H-6-12)	104	1..104
12	Q5SHY1	Thermus thermophilus (strain ATCC 27634 / DSM 579 / HB8)	105	1..105
12	Q6ANB6	Desulfotalea psychrophila (strain LSv54 / DSM 12343)	106	1..104
12	Q9RXV7	Deinococcus radiodurans (strain ATCC 13939 / DSM 20539 / JCM 16871 / LMG 4051 / NBRC 15346 / NCIMB 9279 / R1 / VKM B-1422)	96	1..96
13	A0Q3R4	Clostridium novyi (strain NT)	114	6..114
13	A1BFN1	Chlorobium phaeobacteroides (strain DSM 266)	111	2..108
13	A3DHB8	Acetivibrio thermocellus (strain ATCC 27405 / DSM 1237 / JCM 9322 / NBRC 103400 / NCIMB 10682 / NRRL B-4536 / VPI 7372)	113	4..113
13	A4J0J0	Desulfotomaculum reducens (strain MI-1)	105	2..105
13	A4SEY9	Chlorobium phaeovibrioides (strain DSM 265 / 1930)	109	2..108
13	A4XJV0	Caldicellulosiruptor saccharolyticus (strain ATCC 43494 / DSM 8903 / Tp8T 6331)	113	11..112
13	A5D6B2	Pelotomaculum thermopropionicum (strain DSM 13744 / JCM 10971 / SI)	105	2..105
13	A5HXS7	Clostridium botulinum (strain Hall / ATCC 3502 / NCTC 13319 / Type A)	113	10..113
13	A5N3V8	Clostridium kluyveri (strain ATCC 8527 / DSM 555 / NCIMB 10680)	114	11..114
13	A6TXC8	Alkaliphilus metalliredigens (strain QYMF)	114	8..114
13	A7HGU4	Anaeromyxobacter sp. (strain Fw109-5)	103	1..103
13	A8MKQ2	Alkaliphilus oremlandii (strain OhILAs)	114	6..114
13	A9KQC8	Lachnoclostridium phytofermentans (strain ATCC 700394 / DSM 18823 / ISDg)	119	10..118
13	B0K100	Thermoanaerobacter sp. (strain X514)	111	8..111
13	B0S0K7	Finegoldia magna (strain ATCC 29328 / DSM 20472 / WAL 2508)	113	8..113
13	B2TR54	Clostridium botulinum (strain Eklund 17B / Type B)	113	6..113
13	B2URG7	Akkermansia muciniphila (strain ATCC BAA-835 / DSM 22959 / JCM 33894 / BCRC 81048 / CCUG 64013 / CIP 107961 / Muc)	104	1..104
13	B3DWR3	Methylacidiphilum infernorum (isolate V4)	102	1..102
13	B3EIC4	Chlorobium limicola (strain DSM 245 / NBRC 103803 / 6330)	111	2..109
13	B3EQT2	Chlorobium phaeobacteroides (strain BS1)	111	2..108
13	B3QMU7	Chlorobaculum parvum (strain DSM 263 / NCIMB 8327)	111	2..107
13	B3QYJ3	Chloroherpeton thalassium (strain ATCC 35110 / GB-78)	111	2..108
13	B4SGN6	Pelodictyon phaeoclathratiforme (strain DSM 5477 / BU-1)	111	2..108
13	B4UDA8	Anaeromyxobacter sp. (strain K)	103	1..103
13	B5YKY0	Thermodesulfovibrio yellowstonii (strain ATCC 51303 / DSM 11347 / YP87)	114	3..108
13	B8I550	Ruminiclostridium cellulolyticum (strain ATCC 35319 / DSM 5812 / JCM 6584 / H10)	115	9..115
13	B9MRE0	Caldicellulosiruptor bescii (strain ATCC BAA-1888 / DSM 6725 / Z-1320)	113	11..113
13	C1A7E5	Gemmatimonas aurantiaca (strain T-27 / DSM 14586 / JCM 11422 / NBRC 100505)	104	1..104
13	C1F0Z2	Acidobacterium capsulatum (strain ATCC 51196 / DSM 11244 / BCRC 80197 / JCM 7670 / NBRC 15755 / NCIMB 13165 / 161)	108	2..108
13	C4Z4W1	Lachnospira eligens (strain ATCC 27750 / DSM 3376 / VPI C15-48 / C15-B4)	116	7..116
13	C4ZB57	Agathobacter rectalis (strain ATCC 33656 / DSM 3377 / JCM 17463 / KCTC 5835 / VPI 0990)	113	7..113
13	Q0SWS7	Clostridium perfringens (strain SM101 / Type A)	112	4..112
13	Q18CA3	Clostridioides difficile (strain 630)	116	9..116
13	Q1DAZ8	Myxococcus xanthus (strain DK1622)	105	2..105
13	Q1IQ75	Koribacter versatilis (strain Ellin345)	101	2..101
13	Q2RMH1	Moorella thermoacetica (strain ATCC 39073 / JCM 9320)	104	2..104
13	Q3ARC3	Chlorobium chlorochromatii (strain CaD3)	111	2..108
13	Q3B3D6	Chlorobium luteolum (strain DSM 273 / BCRC 81028 / 2530)	109	2..107
13	Q899U2	Clostridium tetani (strain Massachusetts / E88)	113	8..113
13	Q97MR5	Clostridium acetobutylicum (strain ATCC 824 / DSM 792 / JCM 1419 / LMG 5710 / VKM B-1787)	112	4..112
